# Supplementary material
Source: PubMed Central journal article supplement (PMC7180098)

# Supplementary Figure 1

**A**

| CHR:POS:MUT     | Location | TGS NYU (%) | Hayward et al. (%) | Dutton-Regester et al. (%) | TCGA SKCM WGS (%) |
|-----------------|----------|-------------|--------------------|----------------------------|-------------------|
| 1:153963239:C:T | UTR5     | 10.11       | 10.93              | 9.61                       | 5.71              |
| 1:153963227:C:T | upstream | 4.49        | 7.10               | N/A                        | 5.71              |
| 1:153963207:C:T | upstream | 2.25        | 1.64               | N/A                        | 1.43              |
| 1:153963128:C:T | upstream | 1.12        | N/A                | N/A                        | N/A               |
| 1:153963178:G:A | upstream | 1.12        | N/A                | N/A                        | N/A               |
| 1:153963222:G:A | upstream | 1.12        | 0.00               | N/A                        | 1.43              |
| 1:153963234:C:T | UTR5     | 1.12        | 2.19               | N/A                        | N/A               |
| 1:153963254:G:A | UTR5     | 1.12        | N/A                | N/A                        | N/A               |
| 1:153963724:G:A | intronic | 1.12        | N/A                | N/A                        | N/A               |

**B**

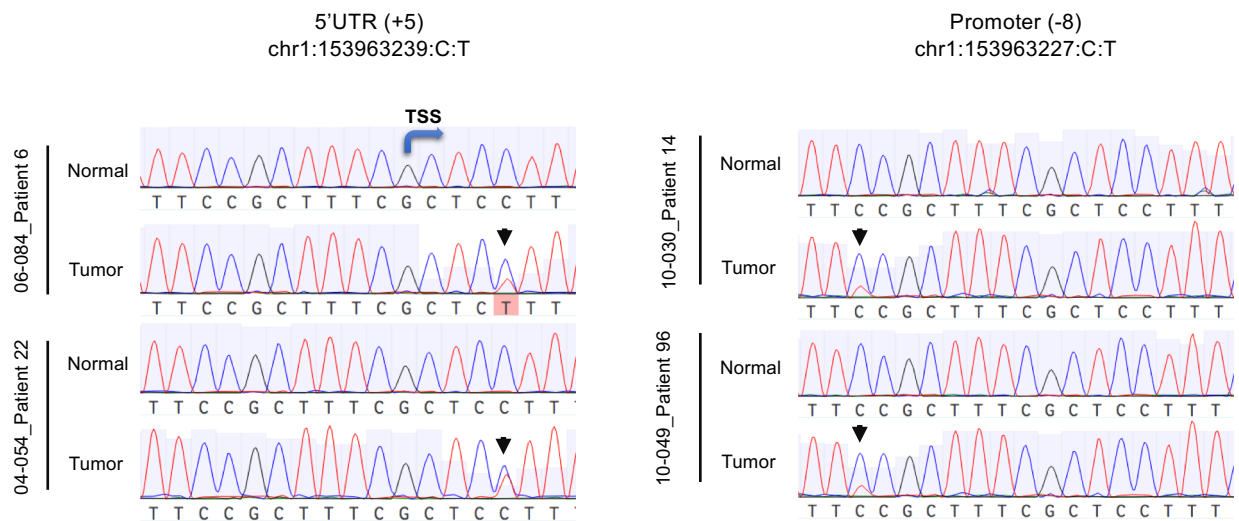

# Supplementary Figure 2

**A**

| q-val<br>p-val | RPS27    | BRAF     | NRAS     | NF1      | TP53     | CDKN2A   |
|----------------|----------|----------|----------|----------|----------|----------|
| <b>RPS27</b>   |          | 8.34E-01 | 8.81E-01 | 8.26E-01 | 9.77E-01 | 8.61E-01 |
| <b>BRAF</b>    | 7.31E-01 |          | 9.99E-01 | 9.75E-01 | 9.34E-01 | 9.05E-01 |
| <b>NRAS</b>    | 8.53E-01 | 9.99E-01 |          | 8.26E-01 | 9.02E-01 | 9.48E-01 |
| <b>NF1</b>     | 5.34E-01 | 9.81E-01 | 6.10E-01 |          | 8.26E-01 | 8.26E-01 |
| <b>TP53</b>    | 9.81E-01 | 9.37E-01 | 8.86E-01 | 6.02E-01 |          | 8.76E-01 |
| <b>CDKN2A</b>  | 8.15E-01 | 8.96E-01 | 9.54E-01 | 2.52E-01 | 8.44E-01 |          |

**B**

| q-val<br>p-val | RPS27    | BRAF      | NRAS     | NF1      | TP53     | CDKN2A   |
|----------------|----------|-----------|----------|----------|----------|----------|
| <b>RPS27</b>   |          | 9.06E-01  | 9.06E-01 | 9.06E-01 | 9.06E-01 | 9.06E-01 |
| <b>BRAF</b>    | 3.95E-01 |           | 6.62E-01 | 9.06E-01 | 9.06E-01 | 9.06E-01 |
| <b>NRAS</b>    | 2.59E-01 | 2.33E-04  |          | 9.06E-01 | 9.06E-01 | 9.06E-01 |
| <b>NF1</b>     | 6.12E-01 | 4.01E-02  | 5.23E-01 |          | 9.06E-01 | 9.06E-01 |
| <b>TP53</b>    | 5.71E-02 | 1.21 E-01 | 2.10E-01 | 5.44E-01 |          | 9.06E-01 |
| <b>CDKN2A</b>  | 3.41E-01 | 1.93 E-01 | 1.11E-01 | 8.53E-01 | 2.99E-01 |          |

**C**

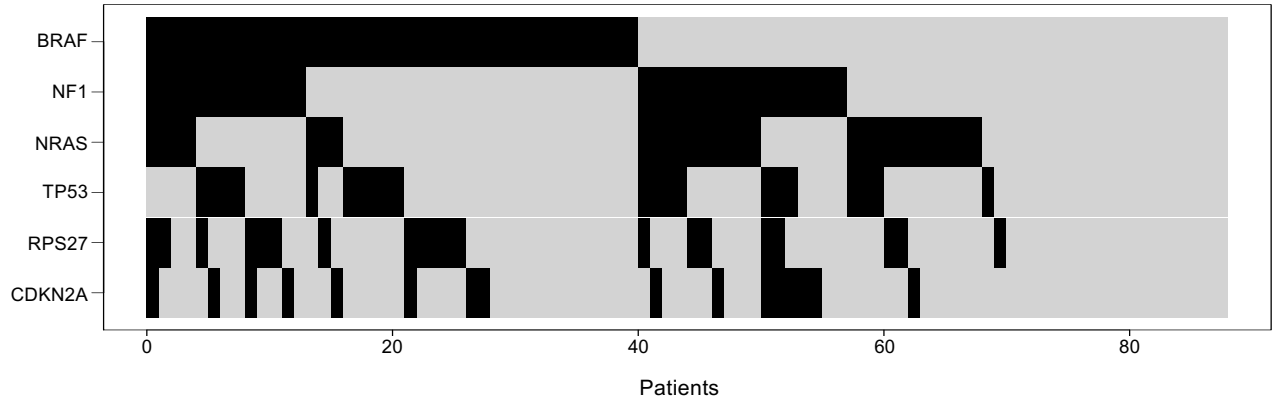

**D**

| q-val<br>p-val | RPS27    | BRAF     | NRAS     | NF1      | TP53     | CDKN2A   |
|----------------|----------|----------|----------|----------|----------|----------|
| <b>RPS27</b>   |          | 9.99E-01 | 9.99E-01 | 9.99E-01 | 9.89E-01 | 9.99E-01 |
| <b>BRAF</b>    | 9.93E-01 |          | 9.99E-01 | 9.99E-01 | 9.99E-01 | 9.99E-01 |
| <b>NRAS</b>    | 9.69E-01 | 9.99E-01 |          | 9.99E-01 | 9.99E-01 | 9.99E-01 |
| <b>NF1</b>     | 8.51E-01 | 9.85E-01 | 9.95E-01 |          | 9.89E-01 | 9.99E-01 |
| <b>TP53</b>    | 7.51E-01 | 9.40E-01 | 9.43E-01 | 6.20E-01 |          | 9.99E-01 |
| <b>CDKN2A</b>  | 9.29E-01 | 9.76E-01 | 9.47E-01 | 9.76E-01 | 9.20E-01 |          |

**E**

| q-val<br>p-val | RPS27    | BRAF     | NRAS     | NF1      | TP53     | CDKN2A   |
|----------------|----------|----------|----------|----------|----------|----------|
| <b>RPS27</b>   |          | 8.16E-01 | 8.96E-01 | 8.96E-01 | 8.96E-01 | 8.96E-01 |
| <b>BRAF</b>    | 1.09E-02 |          | 4.58E-10 | 8.23E-01 | 8.96E-01 | 8.70E-01 |
| <b>NRAS</b>    | 4.65E-02 | 1.84E-13 |          | 8.16E-01 | 8.96E-01 | 8.96E-01 |
| <b>NF1</b>     | 1.89E-01 | 2.01E-02 | 7.29E-03 |          | 8.96E-01 | 8.79E-01 |
| <b>TP53</b>    | 3.15E-01 | 7.98E-02 | 8.27E-02 | 4.42E-01 |          | 8.96E-01 |
| <b>CDKN2A</b>  | 1.06E-01 | 3.46E-02 | 7.96E-02 | 3.56E-02 | 1.20E-01 |          |

**F**

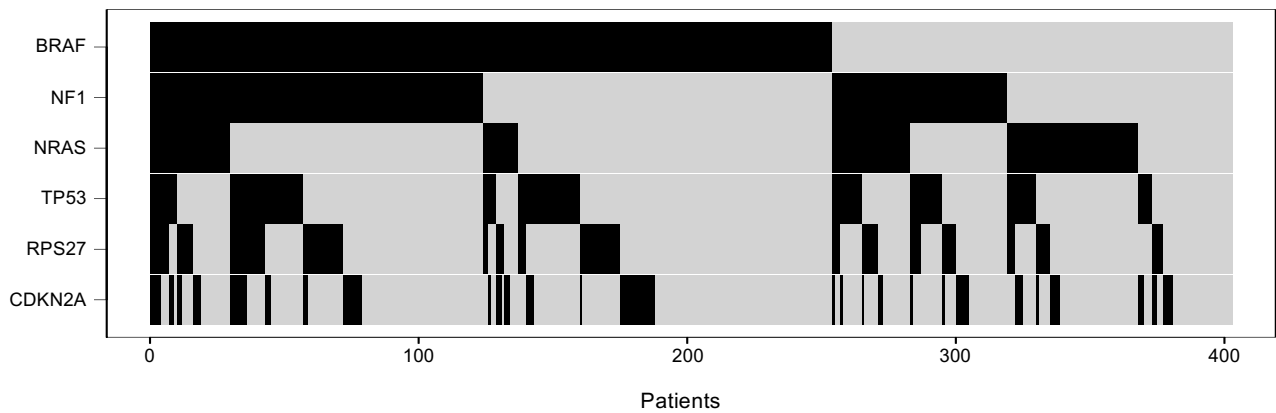

# Supplementary Figure 3

**A**

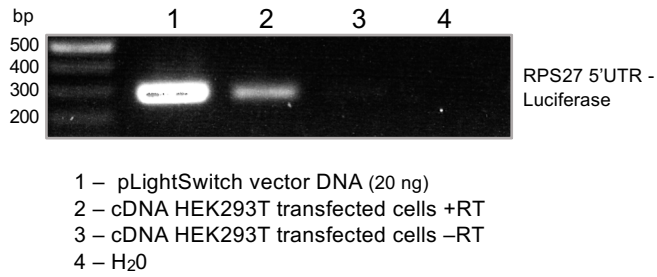

**B**

| Melanoma cell lines | 5'UTR | Promoter (-8) | RPS27 other mutations |
|---------------------|-------|---------------|-----------------------|
| SK-MEL-2            | WT    | WT            | WT                    |
| SK-MEL-5            | WT    | WT            | WT                    |
| SK-MEL-19           | WT    | WT            | WT                    |
| SK-MEL-28           | WT    | WT            | WT                    |
| SK-MEL-29           | WT    | WT            | WT                    |
| SK-MEL-85           | WT    | WT            | WT                    |
| SK-MEL-94           | WT    | WT            | WT                    |
| SK-MEL-100          | WT    | WT            | WT                    |
| SK-MEL-103          | WT    | WT            | WT                    |
| SK-MEL-147          | WT    | WT            | WT                    |
| SK-MEL-152          | WT    | WT            | WT                    |
| SK-MEL-173          | WT    | WT            | WT                    |
| SK-MEL-187          | WT    | WT            | WT                    |
| SK-MEL-192          | WT    | WT            | WT                    |
| SK-MEL-197          | WT    | WT            | WT                    |
| SK-MEL-239          | WT    | WT            | WT                    |
| MEWO                | WT    | WT            | WT                    |
| 451LU               | WT    | MUTATED       | -63 TSS               |
| A375                | WT    | WT            | WT                    |
| 501Mel              | WT    | WT            | WT                    |
| WM 1361A            | WT    | WT            | WT                    |
| WM 39               | WT    | WT            | WT                    |
| WM 278              | WT    | WT            | WT                    |
| WM 3211             | WT    | WT            | WT                    |
| WM 793b             | WT    | WT            | WT                    |

**C**

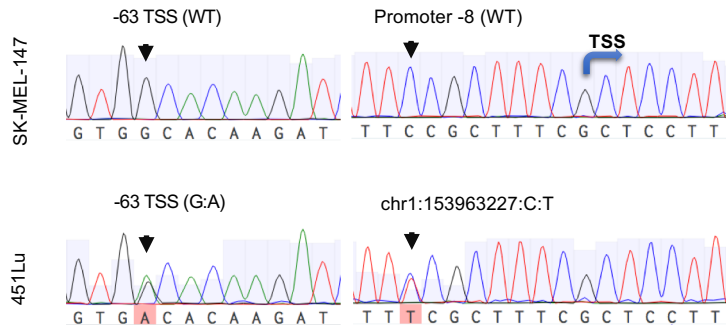

**D**

| Melanoma short-term cultures | 5'UTR | Promoter (-8) | RPS27 other mutations |
|------------------------------|-------|---------------|-----------------------|
| 07-013                       | WT    | WT            | WT                    |
| 09-162                       | WT    | WT            | WT                    |
| 12-126                       | WT    | WT            | WT                    |
| 11-001                       | WT    | WT            | WT                    |
| 11-103                       | WT    | WT            | WT                    |
| 12-126                       | WT    | WT            | WT                    |
| 12-273                       | WT    | WT            | WT                    |
| 10-040                       | WT    | WT            | WT                    |
| 12-019                       | WT    | WT            | WT                    |
| 12-215                       | WT    | WT            | WT                    |
| 09-203                       | WT    | WT            | WT                    |
| 10-230                       | WT    | WT            | WT                    |
| 11-161                       | WT    | WT            | -1 TSS                |

**E**

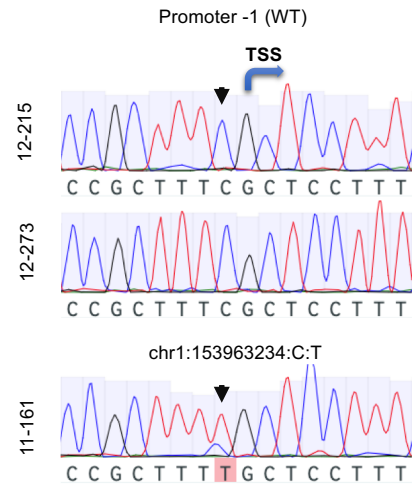

# Supplementary Figure 4

**A**

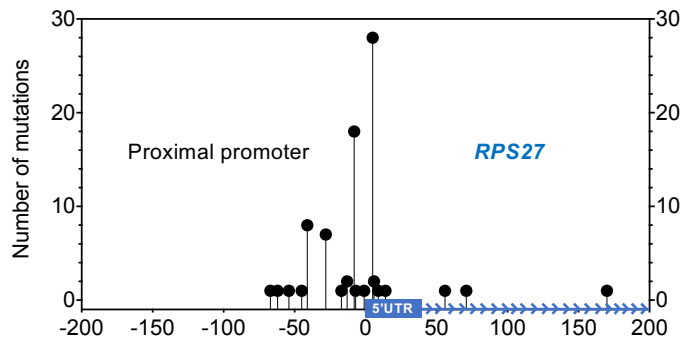

**B**

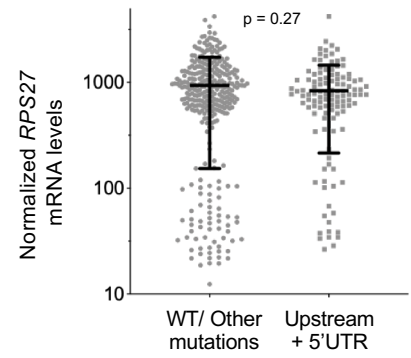

**C**

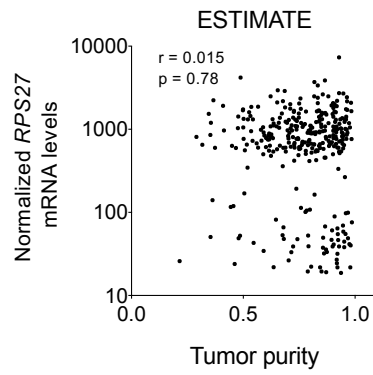

**D**

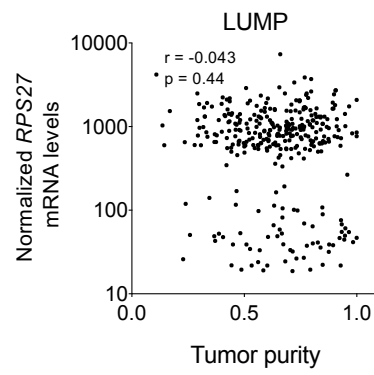

**E**

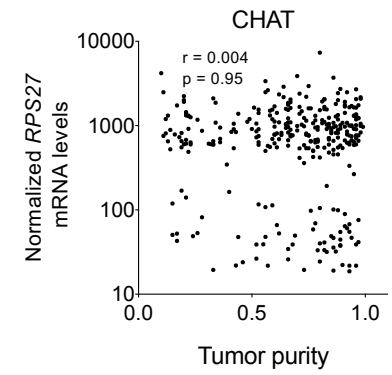

# Supplementary Figure 5

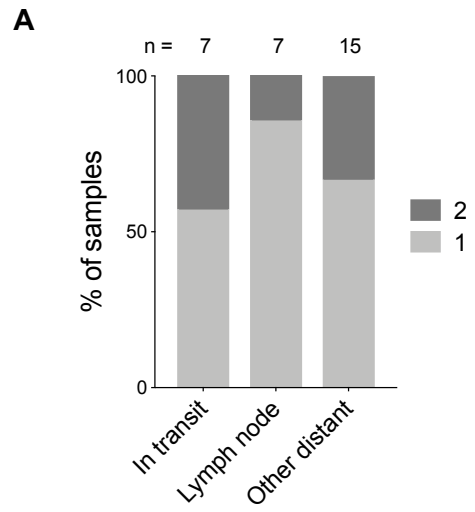

**B**

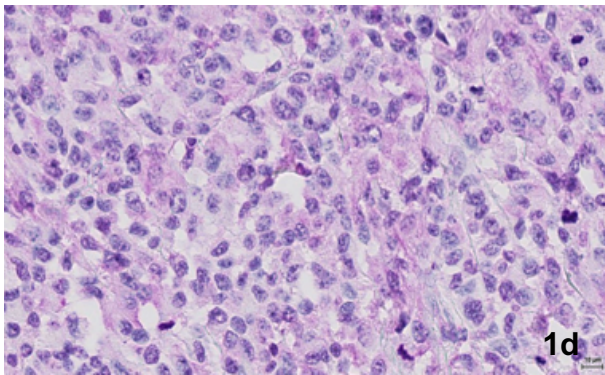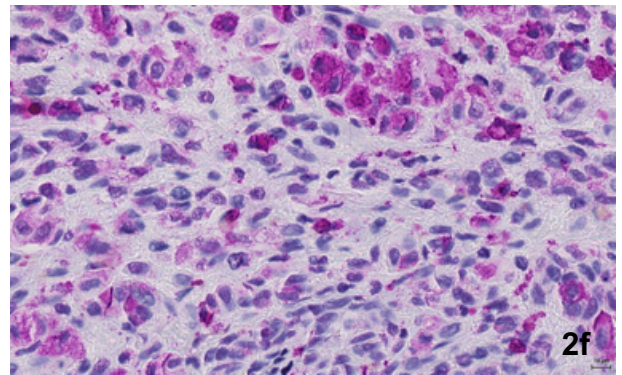

**C**

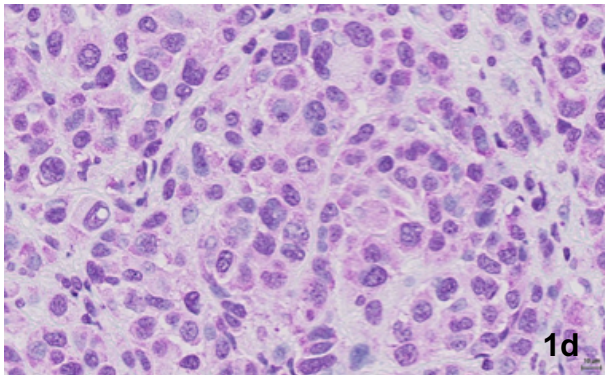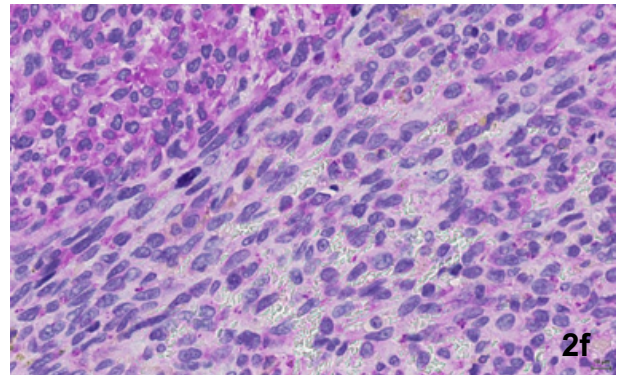

**D**

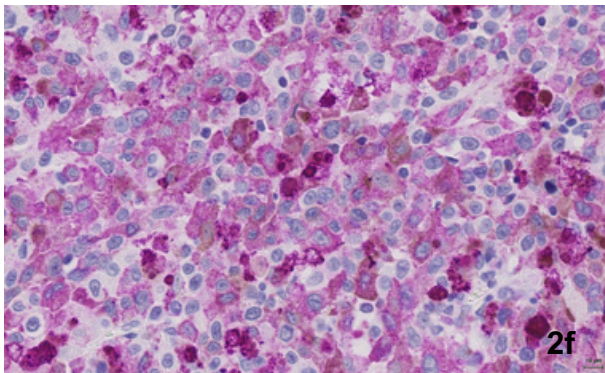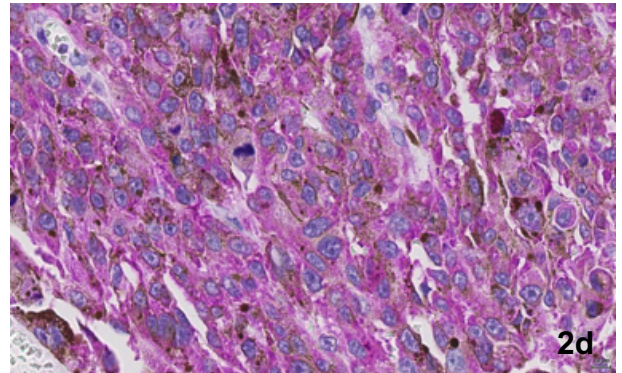

# Supplementary Figure 6

**A**

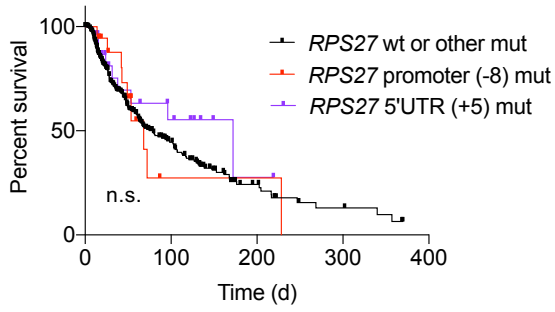

**B**

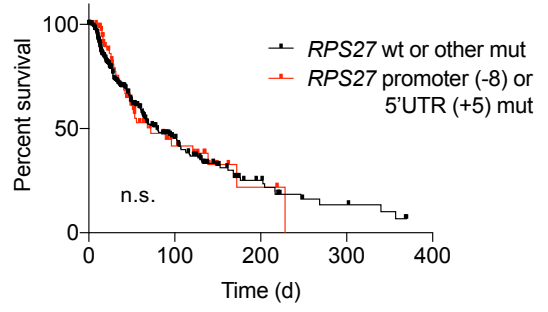

**C**

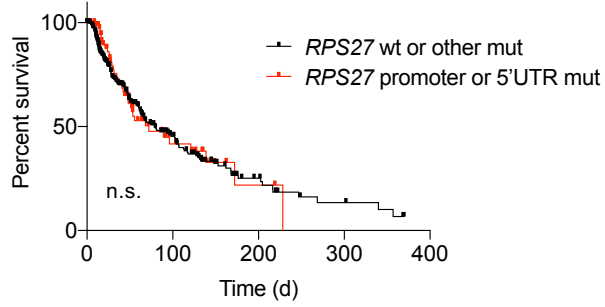

**D**

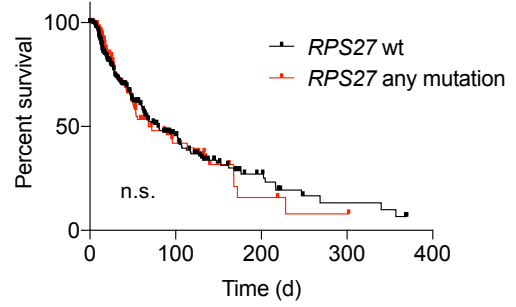

# Supplementary Figure 7

**A**

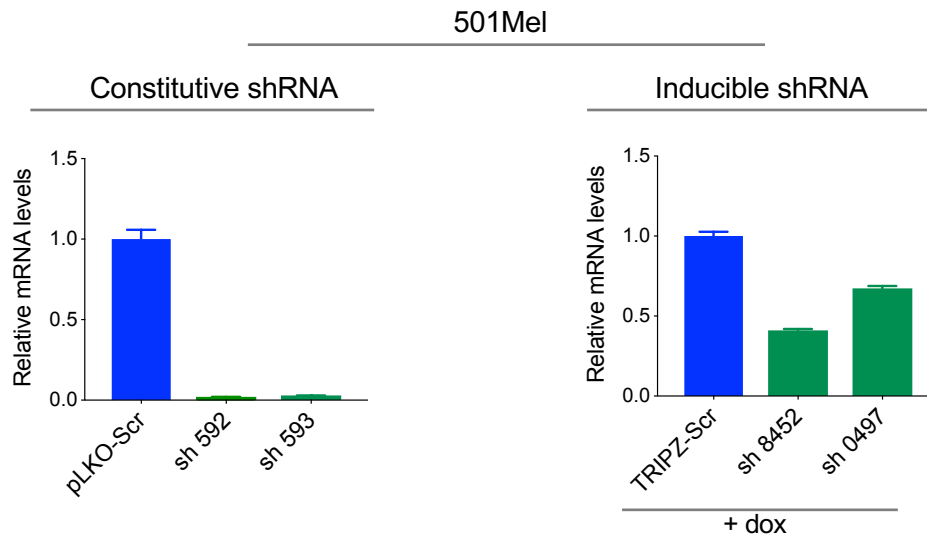

**B**

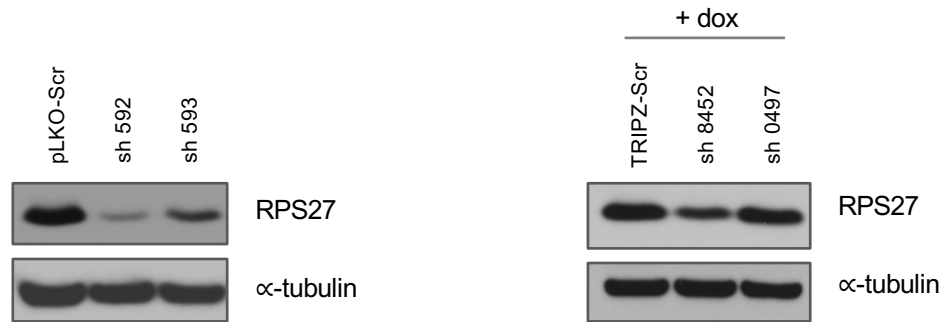

**C**

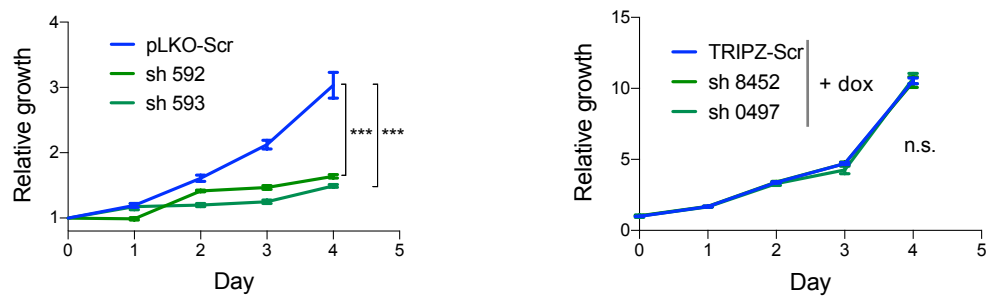

# Supplementary Figure 8

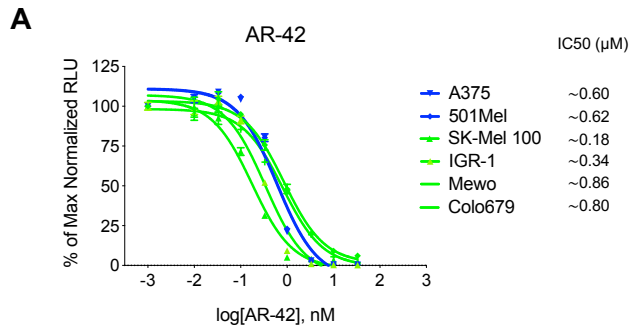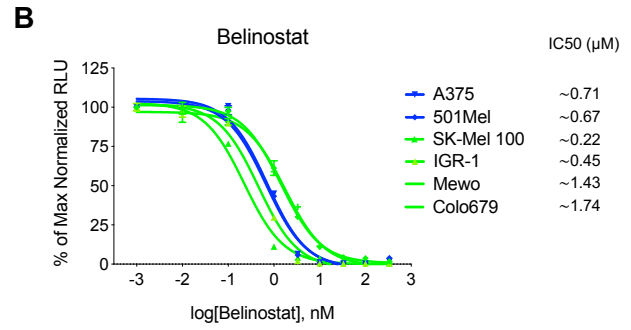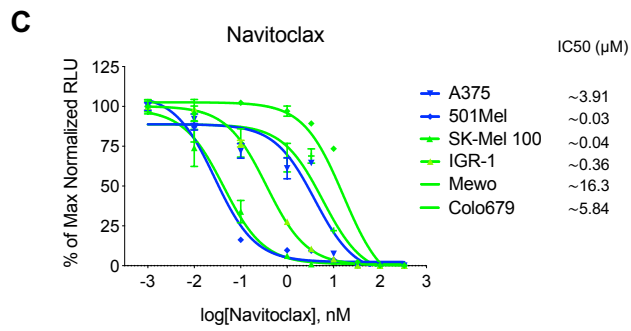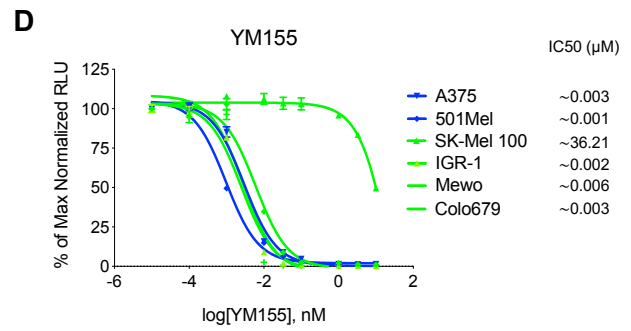



# Supplementary Figure 9

**A**

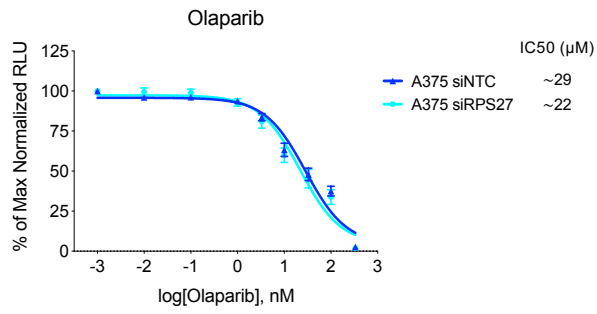

**B**

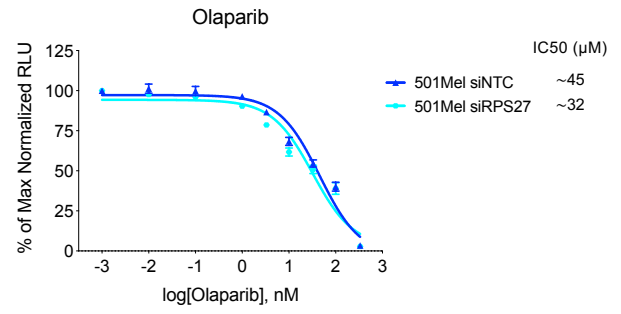

**C**

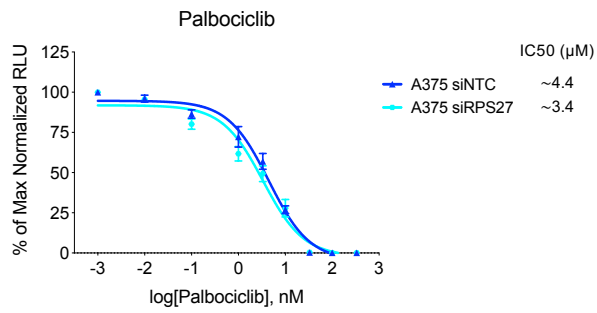

**D**

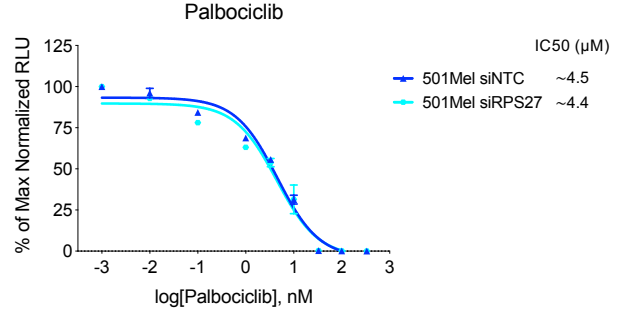

**E**

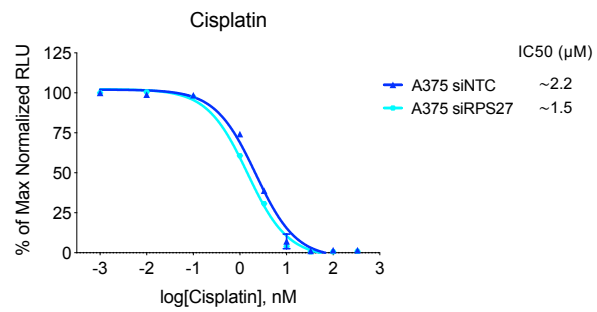

**F**

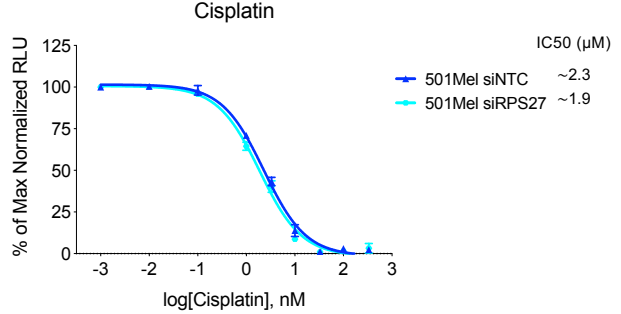

**G**

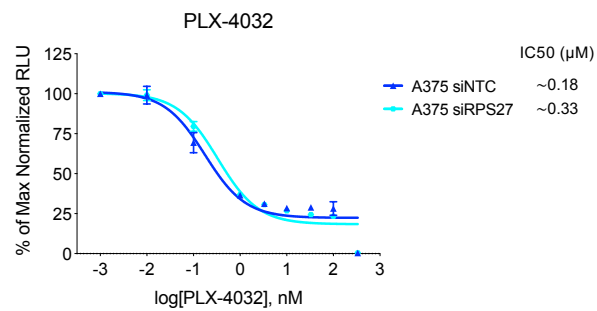

**H**

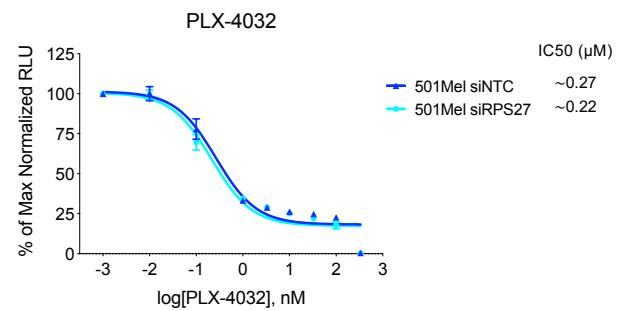

# Supplementary Figure 10

**A**

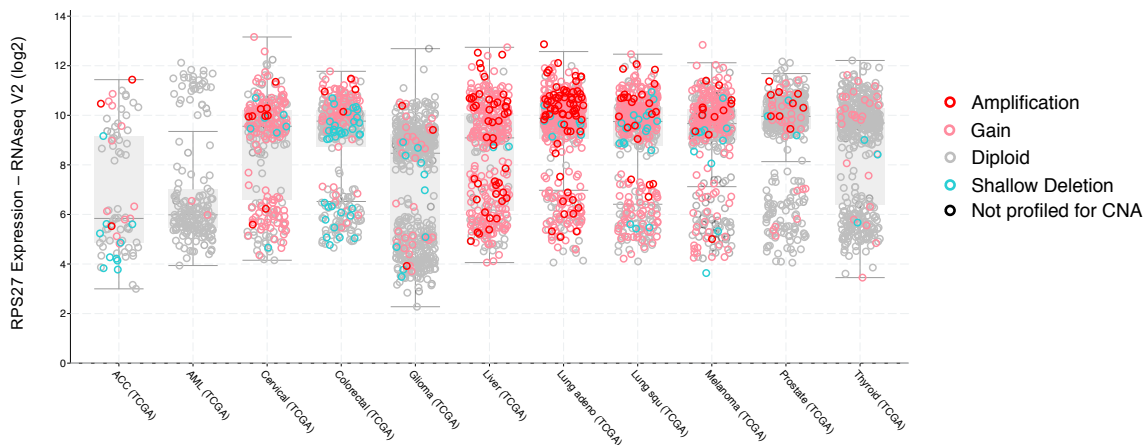

**B**

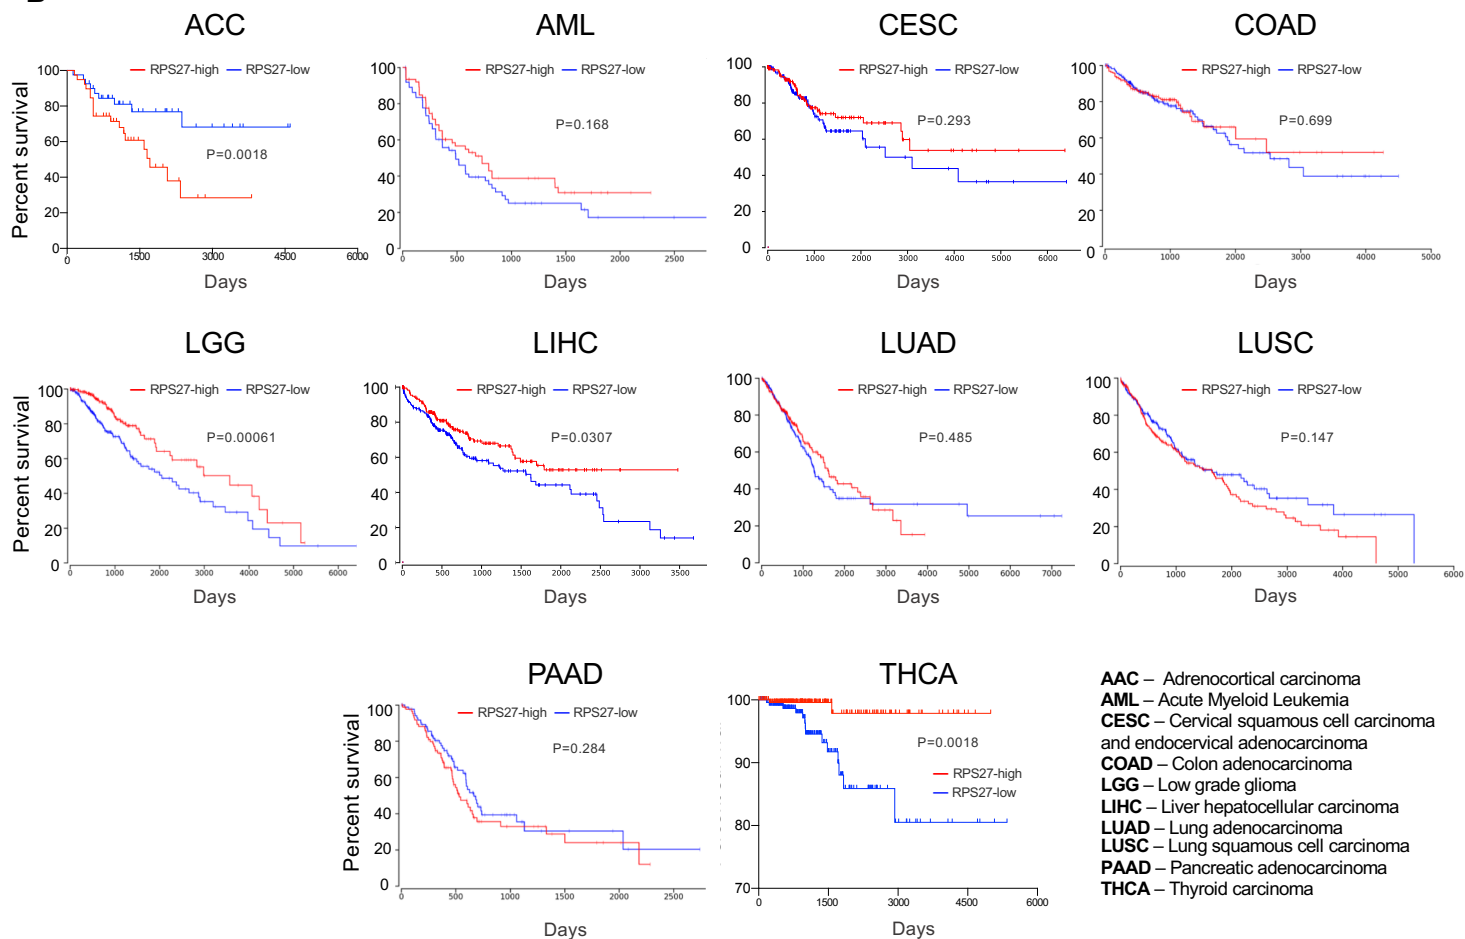

**C**

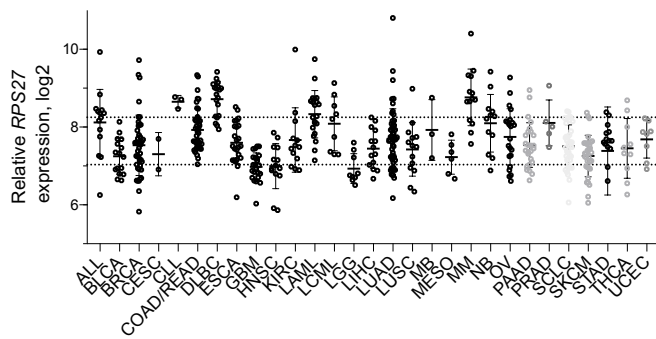

**D**

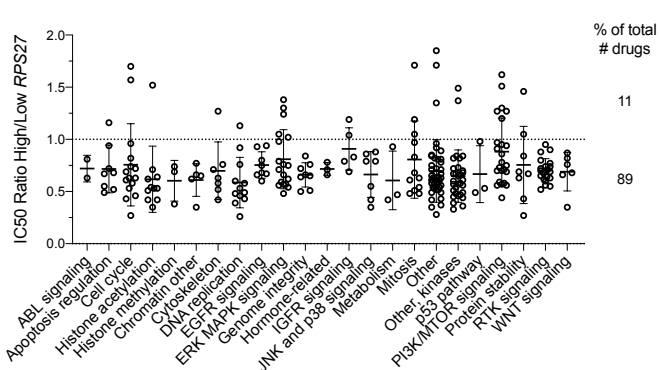

# Supplementary Figure 11

A

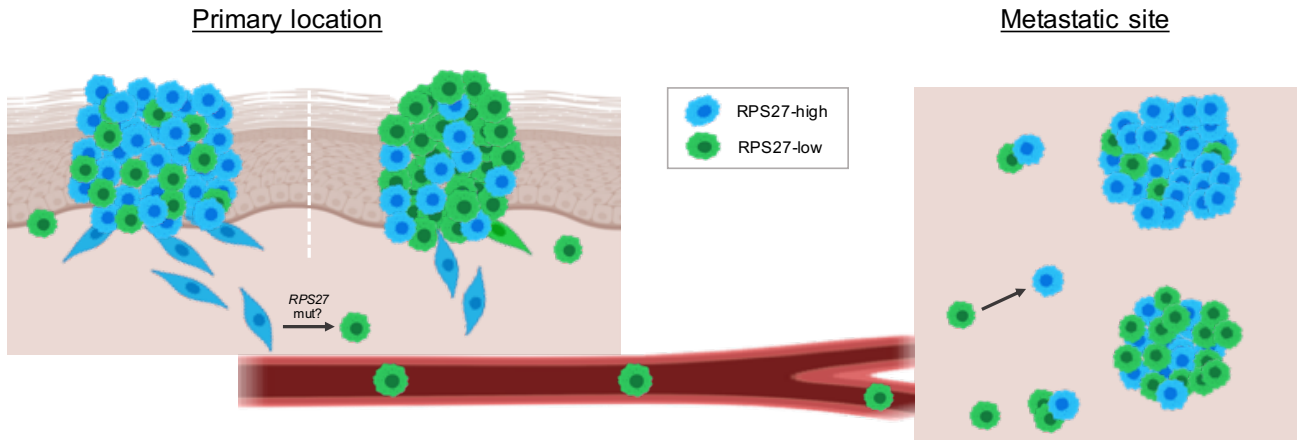

B

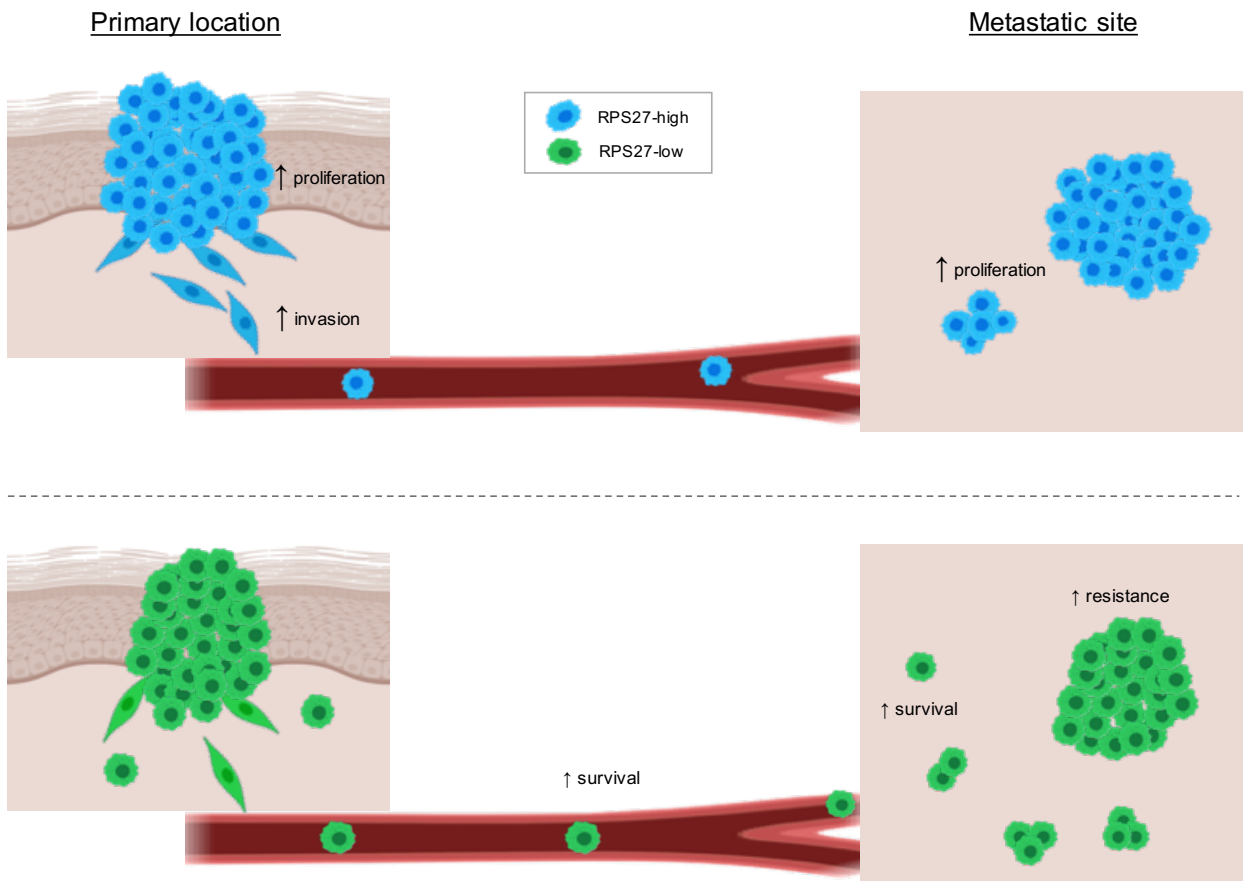

# Supplementary Figure 12

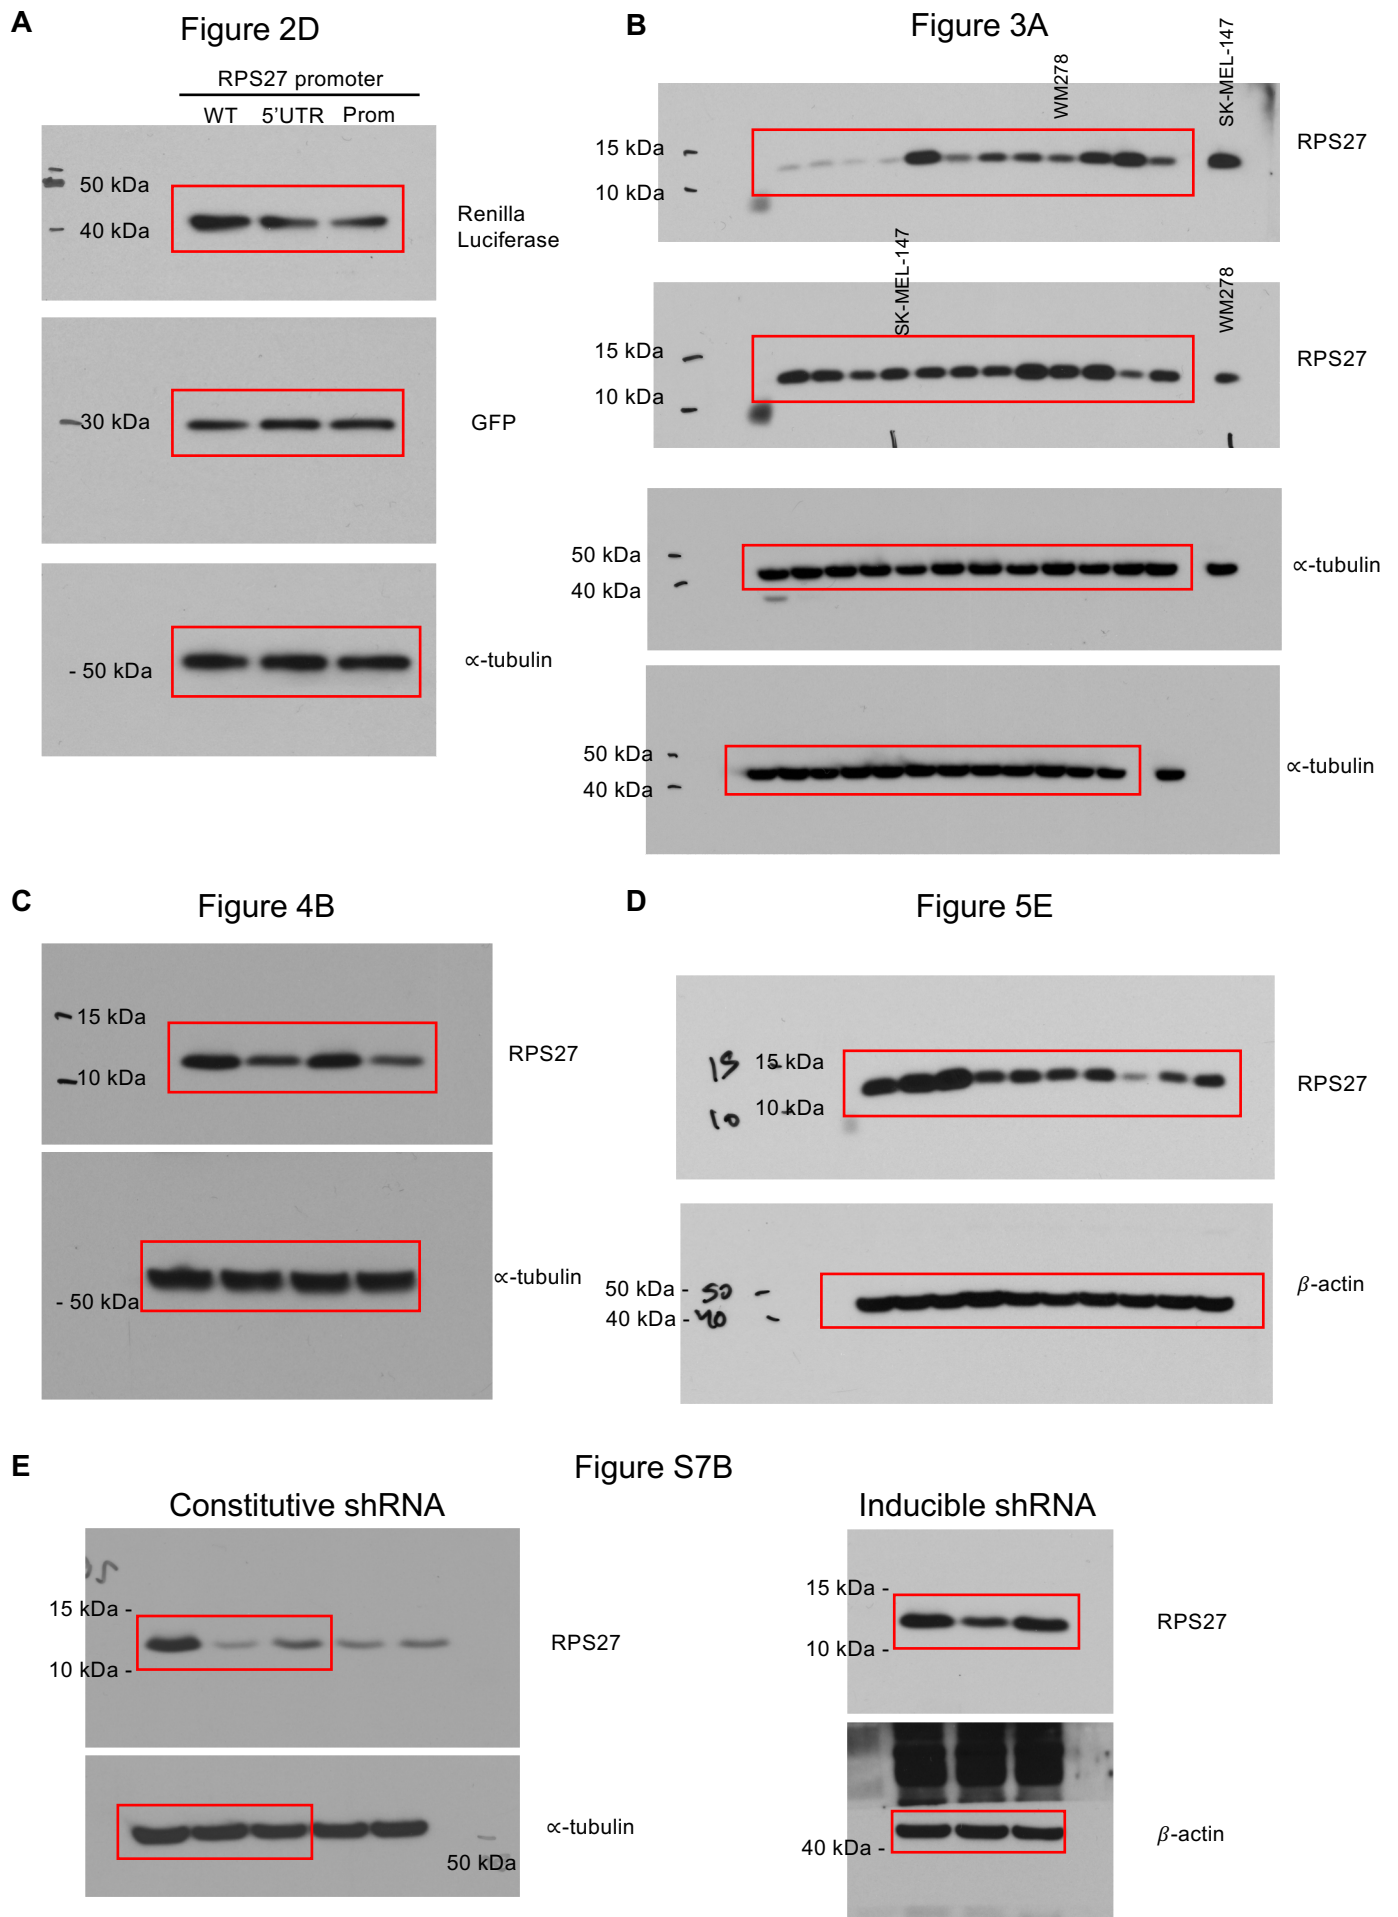

Supplement: NIHMS1057309-supplement-Supp_figS1-12.pdf [file NIHMS1057309-supplement-Supp_figS1-12.pdf]
